# Supplementary material for: A genome-wide positioning systems network algorithm for in silico drug repurposing
Source: PubMed Central journal article supplement (PMC6677722; doi:10.1038/s41467-019-10744-6), 2019-08-02
Supplement: 41467_2019_10744_MOESM2_ESM.pdf [file 41467_2019_10744_MOESM2_ESM.pdf]

## **Description of Additional Supplementary Files**

File Name: Supplementary Data 1

Description: Known cancer driver genes, with significantly mutated genes identified that were collected from TCGA projects. (Excel file)

File Name: Supplementary Data 2

Description: Final patient-specific disease modules across 15 cancer types are identified by the GPSnet algorithm. (Excel file)

File Name: Supplementary Data 3

Description: Known cancer-associated genes were collected from four public databases: the Online Mendelian Inheritance in Man (OMIM) database, HuGE Navigator, PharmGKB, and Comparative Toxicogenomics Database (CTD). (Excel file)

File Name: Supplementary Data 4

Description: FDA-approved cancer type/subtype specific drugs. (Excel file)

File Name: Supplementary Data 5

Description: Computationally predicted anticancer indications across 15 cancer types by both network proximity and gene-set enrichment analysis approaches. (Excel file)

File Name: Supplementary Data 6

Description: Differentially expressed analysis in LUAD patients and correlation analysis between gene expression and metabolite abundance in ~70 NSCLC cell lines. (Excel file)
